# Supplementary material
Source: PubMed Central journal article supplement (PMC5647569)
Supplement: es7b02811_si_001.pdf [file es7b02811_si_001.pdf]

## Supporting Information

Exposure to animal feces and human health: A systematic review and proposed research priorities

Gauthami Penakalapati, Jenna Swarthout, Miranda J. Delahoy, Lydia McAliley, Breanna Wodnik, Karen Levy, and Matthew C. Freeman

**Corresponding Author:** \*Address correspondence to M.C. Freeman, Rollins School of Public Health, 1518 Clifton Road NE, Claudia Nance Rollins Bldg., 2027, Atlanta, GA 30322 USA. Telephone: (404) 712-8767. E-mail: [matthew.freeman@emory.edu](mailto:matthew.freeman@emory.edu).

## Table of Contents

|                                                                                                                                                                                   |           |
|-----------------------------------------------------------------------------------------------------------------------------------------------------------------------------------|-----------|
| <b>Supporting Information 1.</b> Search String for Exposure to animal feces and human health: A systematic review and proposed research priorities .....                          | <b>2</b>  |
| <b>Figure S1.</b> Global PRISMA Chart .....                                                                                                                                       | <b>4</b>  |
| <b>TableS1.</b> Data Extraction Forms .....                                                                                                                                       | <b>4</b>  |
| <b>Table S2.</b> PRISMA Checklist .....                                                                                                                                           | <b>5</b>  |
| <b>Table S3.</b> Characteristics of studies ( <i>n</i> =62) included in review of potential health impacts from exposure to animals, animal feces, and associated pathogens ..... | <b>7</b>  |
| <b>References</b> .....                                                                                                                                                           | <b>15</b> |

**Supporting Information 1.** Search String for Exposure to animal feces and human health: A systematic review and proposed research priorities

We searched in the following databases: PubMed, Web of Science, Cochrane Library, EMBASE, and CAB Direct. We also included a partial search of the Environmental Sciences and Pollution Management (ESPM) database, but due to host database server challenges, 26% of full search results this database could not be downloaded. The database searches took place on October 3, 2016.

We used the following generic search string: [(animals or animal or zoonotic or zoonosis or "domestic animal" or "domestic livestock" or livestock or "animal husbandry" or cattle or cow or bovine or swine or pig or dog or cat or goat or sheep or poultry or chicken or fowl or duck or goose or turkey or mice or rat or murine or rabbit or horse or "guinea pig" or donkey or "water buffalo" or camel or yak or llama or alpaca) AND (feces OR faeces OR fecal OR faecal OR waste OR manure OR dung OR dropping) AND (exposure OR exposures OR contact OR contamination or contaminate or contaminated or presence) AND (human or humans or children or child or adult or patients or infant)].

**PubMed Search:**

(((Animals[Title/Abstract] OR animal[Title/Abstract] OR zoonotic[Title/Abstract] OR zoonosis[Title/Abstract] OR "domestic animal"[Title/Abstract] OR "domestic livestock"[Title/Abstract] OR livestock[Title/Abstract] OR "animal husbandry"[Title/Abstract] OR cattle[Title/Abstract] OR cow[Title/Abstract] OR bovine[Title/Abstract] OR swine[Title/Abstract] OR pig[Title/Abstract] OR dog[Title/Abstract] OR cat[Title/Abstract] OR goat[Title/Abstract] OR sheep[Title/Abstract] OR poultry[Title/Abstract] OR chicken[Title/Abstract] OR fowl[Title/Abstract] OR duck[Title/Abstract] OR goose[Title/Abstract] OR turkey[Title/Abstract] OR mice[Title/Abstract] OR rat[Title/Abstract] OR murine[Title/Abstract] OR rabbit[Title/Abstract] OR horse[Title/Abstract] OR "guinea pig"[Title/Abstract] OR donkey[Title/Abstract] OR "water buffalo"[Title/Abstract] OR camel[Title/Abstract] OR yak[Title/Abstract] OR llama[Title/Abstract] OR alpaca[Title/Abstract])) AND (feces[Title/Abstract] OR faeces[Title/Abstract] OR fecal[Title/Abstract] OR faecal[Title/Abstract] OR waste[Title/Abstract] OR manure[Title/Abstract] OR dung[Title/Abstract] OR dropping[Title/Abstract])) AND (exposure[Title/Abstract] OR exposures[Title/Abstract] OR contact[Title/Abstract] OR contamination[Title/Abstract] OR contaminate[Title/Abstract] OR contaminated[Title/Abstract] OR presence[Title/Abstract])) AND (human[Title/Abstract] OR humans[Title/Abstract] OR children[Title/Abstract] OR child[Title/Abstract] OR adult[Title/Abstract] OR patients[Title/Abstract] OR infant[Title/Abstract])

**Web of Science/BIOSIS Search:**

TOPIC: (Animals or animal or zoonotic or zoonosis or "domestic animal" or "domestic livestock" or livestock or "animal husbandry" or cattle or cow or bovine or swine or pig or dog or cat or goat or sheep or poultry or chicken or fowl or duck or goose or turkey or mice or rat or murine or rabbit or horse or "guinea pig" or donkey or "water buffalo" or camel or yak or llama or alpaca) AND TOPIC: (feces OR faeces OR fecal OR faecal OR waste OR manure OR dung OR dropping) AND TOPIC: (exposure OR exposures OR contact OR contamination or contaminate or contaminated or presence) AND TOPIC: (human or humans or children or child or adult or patients or infant)

**Cochrane Library Search:**

'(Animals or animal or zoonotic or zoonosis or "domestic animal" or "domestic livestock" or livestock or "animal husbandry" or cattle or cow or bovine or swine or pig or dog or cat or goat or sheep or poultry or chicken or fowl or duck or goose or turkey or mice or rat or murine or rabbit or horse or "guinea pig" or donkey or "water buffalo" or camel or yak or llama or alpaca) in Title, Abstract, Keywords and (feces OR faeces OR fecal OR faecal OR waste OR manure OR dung OR dropping) in Title, Abstract, Keywords and (exposure OR exposures OR contact OR contamination or contaminate or contaminated or presence) in Title, Abstract, Keywords and (human or humans or children or child or adult or patients or infant) in Title, Abstract, Keywords

**EMBASE Search:**

animals:ab,ti OR animal:ab,ti OR zoonotic:ab,ti OR zoonosis:ab,ti OR 'domestic animal':ab,ti OR 'domestic livestock':ab,ti OR livestock:ab,ti OR 'animal husbandry':ab,ti OR cattle:ab,ti OR cow:ab,ti OR bovine:ab,ti OR swine:ab,ti OR pig:ab,ti OR dog:ab,ti OR cat:ab,ti OR goat:ab,ti OR sheep:ab,ti OR poultry:ab,ti OR chicken:ab,ti OR fowl:ab,ti OR duck:ab,ti OR goose:ab,ti OR turkey:ab,ti OR mice:ab,ti OR rat:ab,ti OR murine:ab,ti OR rabbit:ab,ti OR horse:ab,ti OR 'guinea pig':ab,ti OR donkey:ab,ti OR 'water buffalo':ab,ti OR camel:ab,ti OR yak:ab,ti OR llama:ab,ti OR alpaca:ab,ti AND (feces:ab,ti OR faeces:ab,ti OR fecal:ab,ti OR faecal:ab,ti OR waste:ab,ti OR manure:ab,ti OR dung:ab,ti OR dropping:ab,ti) AND (exposure:ab,ti OR exposures:ab,ti OR contact:ab,ti OR contamination:ab,ti OR contaminate:ab,ti OR contaminated:ab,ti OR presence:ab,ti) AND (human:ab,ti OR humans:ab,ti OR children:ab,ti OR child:ab,ti OR adult:ab,ti OR patients:ab,ti OR infant:ab,ti)

**CAB Direct Search:**

ab:((Animals or animal or zoonotic or zoonosis or "domestic animal" or "domestic livestock" or livestock or "animal husbandry" or cattle or cow or bovine or swine or pig or dog or cat or goat or sheep or poultry or chicken or fowl or duck or goose or turkey or mice or rat or murine or rabbit or horse or "guinea pig" or donkey or "water buffalo" or camel or yak or llama or alpaca)) AND ab:((feces OR faeces OR fecal OR faecal OR waste OR manure OR dung OR dropping)) AND ab:((exposure OR exposures OR contact OR contamination or contaminate or contaminated or presence) ) AND ab:((human or humans or children or child or adult or patients or infant))

**ESPM Search:**

ab((Animals OR animal OR zoonotic OR zoonosis OR "domestic animal" OR "domestic livestock" OR livestock OR "animal husbandry" OR cattle OR cow OR bovine OR swine OR pig OR dog OR cat OR goat OR sheep OR poultry OR chicken OR fowl OR duck OR goose OR turkey OR mice OR rat OR murine OR rabbit OR horse OR "guinean pig" OR donkey OR "water buffalo" OR camel OR yak OR llama OR alpaca)) AND ab((feces OR faeces OR fecal OR faecal OR waste OR manure OR dung OR dropping)) AND ab((exposure OR exposures OR contact OR contamination OR contaminate OR contaminated OR presence)) AND ab((human OR humans OR children OR child OR adult OR patients OR infant))

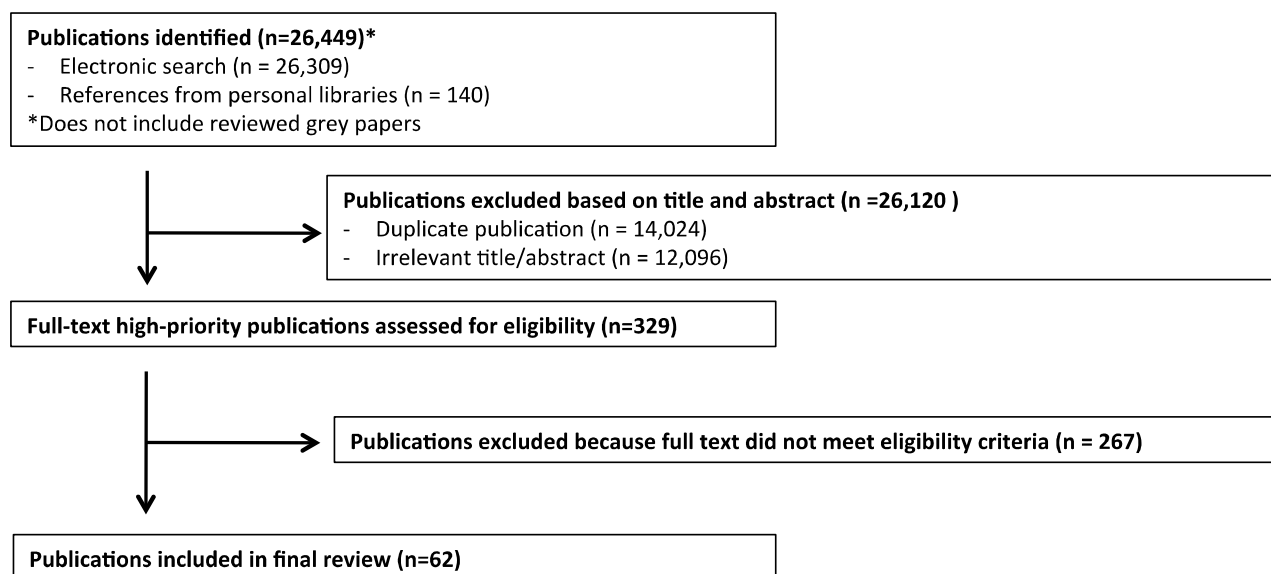

**Figure S1.** Global PRISMA Chart - Adapted from Moher, D., Liberati, A., Tetzlaff, J., Altman, D.G., The PRISMA Group. Preferred Reporting Items for Systematic Reviews and MetaAnalyses: The PRISMA Statement. *PLoS Medicine*. **2009**, 6, e1000097. Copyright 2009, The PRISMA Group.

**TableS1.** Data Extraction Forms

|                                                                                                                                                                                    |  |
|------------------------------------------------------------------------------------------------------------------------------------------------------------------------------------|--|
| Key Findings                                                                                                                                                                       |  |
| Pathogen & Health Outcomes<br>Possible health outcomes: diarrhea, enteric infection, STH, trachoma, nutritional growth outcomes, microbial source tracking, behaviors/risk-factors |  |
| Population                                                                                                                                                                         |  |
| Animal                                                                                                                                                                             |  |
| Country                                                                                                                                                                            |  |
| Study Design & Sample Size                                                                                                                                                         |  |
| Research Objective                                                                                                                                                                 |  |
| Findings                                                                                                                                                                           |  |
| Methods                                                                                                                                                                            |  |

**Table S2.** PRISMA Checklist<sup>1</sup>

| Section/topic                      | #  | Checklist item                                                                                                                                                                                                                                                                                              | Reported on page #            |
|------------------------------------|----|-------------------------------------------------------------------------------------------------------------------------------------------------------------------------------------------------------------------------------------------------------------------------------------------------------------|-------------------------------|
| <b>TITLE</b>                       |    |                                                                                                                                                                                                                                                                                                             |                               |
| Title                              | 1  | Identify the report as a systematic review, meta-analysis, or both.                                                                                                                                                                                                                                         | Title: a systematic review    |
| <b>ABSTRACT</b>                    |    |                                                                                                                                                                                                                                                                                                             |                               |
| Structured summary                 | 2  | Provide a structured summary including, as applicable: background; objectives; data sources; study eligibility criteria, participants, and interventions; study appraisal and synthesis methods; results; limitations; conclusions and implications of key findings; systematic review registration number. | Abstract                      |
| <b>INTRODUCTION</b>                |    |                                                                                                                                                                                                                                                                                                             |                               |
| Rationale                          | 3  | Describe the rationale for the review in the context of what is already known.                                                                                                                                                                                                                              | Introduction                  |
| Objectives                         | 4  | Provide an explicit statement of questions being addressed with reference to participants, interventions, comparisons, outcomes, and study design (PICOS).                                                                                                                                                  | Introduction                  |
| <b>METHODS</b>                     |    |                                                                                                                                                                                                                                                                                                             |                               |
| Protocol and registration          | 5  | Indicate if a review protocol exists, if and where it can be accessed (e.g., Web address), and, if available, provide registration information including registration number.                                                                                                                               | Methods                       |
| Eligibility criteria               | 6  | Specify study characteristics (e.g., PICOS, length of follow-up) and report characteristics (e.g., years considered, language, publication status) used as criteria for eligibility, giving rationale.                                                                                                      | Methods                       |
| Information sources                | 7  | Describe all information sources (e.g., databases with dates of coverage, contact with study authors to identify additional studies) in the search and date last searched.                                                                                                                                  | Methods                       |
| Search                             | 8  | Present full electronic search strategy for at least one database, including any limits used, such that it could be repeated.                                                                                                                                                                               | Supplemental Material 1, p2-3 |
| Study selection                    | 9  | State the process for selecting studies (i.e., screening, eligibility, included in systematic review, and, if applicable, included in the meta-analysis).                                                                                                                                                   | Methods                       |
| Data collection process            | 10 | Describe method of data extraction from reports (e.g., piloted forms, independently, in duplicate) and any processes for obtaining and confirming data from investigators.                                                                                                                                  | Methods                       |
| Data items                         | 11 | List and define all variables for which data were sought (e.g., PICOS, funding sources) and any assumptions and simplifications made.                                                                                                                                                                       | Methods                       |
| Risk of bias in individual studies | 12 | Describe methods used for assessing risk of bias of individual studies (including specification of whether this was done at the study or outcome level), and how this information is to be used in any data synthesis.                                                                                      | Not assessed                  |
| Summary measures                   | 13 | State the principal summary measures (e.g., risk ratio, difference in means).                                                                                                                                                                                                                               | Not assessed                  |
| Synthesis of results               | 14 | Describe the methods of handling data and combining results of studies, if done, including measures of consistency (e.g., $I^2$ ) for each meta-analysis.                                                                                                                                                   | Not assessed                  |
| Risk of bias across studies        | 15 | Specify any assessment of risk of bias that may affect the cumulative evidence (e.g., publication bias, selective reporting within studies).                                                                                                                                                                | Not assessed                  |

| Section/topic                 | #  | Checklist item                                                                                                                                                                                           | Reported on page # |
|-------------------------------|----|----------------------------------------------------------------------------------------------------------------------------------------------------------------------------------------------------------|--------------------|
| Additional analyses           | 16 | Describe methods of additional analyses (e.g., sensitivity or subgroup analyses, meta-regression), if done, indicating which were pre-specified.                                                         | Not assessed       |
| <b>RESULTS</b>                |    |                                                                                                                                                                                                          |                    |
| Study selection               | 17 | Give numbers of studies screened, assessed for eligibility, and included in the review, with reasons for exclusions at each stage, ideally with a flow diagram.                                          | Results, Table S1  |
| Study characteristics         | 18 | For each study, present characteristics for which data were extracted (e.g., study size, PICOS, follow-up period) and provide the citations.                                                             | Table 3            |
| Risk of bias within studies   | 19 | Present data on risk of bias of each study and, if available, any outcome level assessment (see item 12).                                                                                                | Not assessed       |
| Results of individual studies | 20 | For all outcomes considered (benefits or harms), present, for each study: (a) simple summary data for each intervention group (b) effect estimates and confidence intervals, ideally with a forest plot. | Not assessed       |
| Synthesis of results          | 21 | Present results of each meta-analysis done, including confidence intervals and measures of consistency.                                                                                                  | Not assessed       |
| Risk of bias across studies   | 22 | Present results of any assessment of risk of bias across studies (see Item 15).                                                                                                                          | Not assessed       |
| Additional analysis           | 23 | Give results of additional analyses, if done (e.g., sensitivity or subgroup analyses, meta-regression [see Item 16]).                                                                                    | Not assessed       |
| <b>DISCUSSION</b>             |    |                                                                                                                                                                                                          |                    |
| Summary of evidence           | 24 | Summarize the main findings including the strength of evidence for each main outcome; consider their relevance to key groups (e.g., healthcare providers, users, and policy makers).                     | Discussion         |
| Limitations                   | 25 | Discuss limitations at study and outcome level (e.g., risk of bias), and at review-level (e.g., incomplete retrieval of identified research, reporting bias).                                            | Discussion         |
| Conclusions                   | 26 | Provide a general interpretation of the results in the context of other evidence, and implications for future research.                                                                                  | Discussion         |
| <b>FUNDING</b>                |    |                                                                                                                                                                                                          |                    |
| Funding                       | 27 | Describe sources of funding for the systematic review and other support (e.g., supply of data); role of funders for the systematic review.                                                               | Title Page         |

Adapted from Moher, D., Liberati, A., Tetzlaff, J., Altman, D.G., The PRISMA Group. Preferred Reporting Items for Systematic Reviews and MetaAnalyses: The PRISMA Statement. *PLoS Medicine*. 2009, 6, e1000097. Copyright 2009, The PRISMA Group.

**Table S3.** Characteristics of studies ( $n=62$ ) included in review of potential health impacts from exposure to animals, animal feces, and associated pathogens

| Authors                   | Location & Geographic Classification | Study Population     | Data sources                     | Animals                           | Pathogens                                                                                                                                                                                                                                                                                                                              | Health Outcomes                    | Exposures to Animal Feces <sup>a</sup>                                                                                                              | Study Design & Sample Size                                             |
|---------------------------|--------------------------------------|----------------------|----------------------------------|-----------------------------------|----------------------------------------------------------------------------------------------------------------------------------------------------------------------------------------------------------------------------------------------------------------------------------------------------------------------------------------|------------------------------------|-----------------------------------------------------------------------------------------------------------------------------------------------------|------------------------------------------------------------------------|
| a Mpalang et al. 2014     | Democratic Republic of Congo; urban  | Goat meat            | Goat feces, goat meat            | Goats                             | <b>Bacteria:</b> <i>Campylobacter coli</i> , <i>Campylobacter jejuni</i>                                                                                                                                                                                                                                                               | None                               | <b>Contamination of food (CF)</b>                                                                                                                   | cross-sectional; goat meat samples (n=402), goat fecal samples (n=242) |
| Acosta-Jamett et al. 2014 | Chile; rural                         | Dog-owning adults    | Human blood, dog feces, survey   | Dogs                              | <b>Helminths:</b> <i>Echinococcus granulosus</i>                                                                                                                                                                                                                                                                                       | Helminth seropositivity            | <b>Presence of/contact with animals (PCA); contamination of environment (CE):</b> permitting dogs to defecate in orchards, not collecting dog feces | cross-sectional; humans (n=403), dogs (n=93)                           |
| Adjei et al. 2004         | Ghana; urban                         | Children <5 years    | Human stool, observation, survey | Cats, dogs, goats, poultry, sheep | <b>Bacteria:</b> <i>Salmonella</i> spp., <i>Shigella</i> spp. <b>Helminths:</b> Hookworm ( <i>Ancylostoma</i> spp.), <i>Ascaris lumbricoides</i> , <i>Schistosoma mansoni</i> , <i>Strongyloides</i> spp., and <i>Trichuris trichiura</i> <b>Protozoa:</b> <i>Cryptosporidium</i> spp., <i>Giardia lamblia</i> , <i>Entamoeba</i> spp. | Diarrhea, pathogens found in stool | <b>PCA:</b> animals inside                                                                                                                          | case-control; diarrheic children (n=227), controls (n=77)              |
| Alyousefi et al. 2011     | Yemen; urban                         | All individuals      | Human stool, survey              | Not specified                     | <b>Helminths:</b> <i>A. lumbricoides</i> , <i>Enterobius vermicularis</i> , <i>Hymenolepis nana</i> , <i>S. mansoni</i> <b>Protozoa:</b> <i>Cryptosporidium</i> spp., <i>Giardia duodenalis</i> , <i>Entamoeba histolytica/dispar</i>                                                                                                  | Pathogens found in stool           | <b>PCA:</b> animals inside                                                                                                                          | cross-sectional; humans (n=503)                                        |
| Anuar et al. 2012         | Malaysia; rural and suburban         | Individuals >2 years | Human stool, survey              | Not specified                     | <b>Protozoa:</b> <i>Entamoeba</i> spp.                                                                                                                                                                                                                                                                                                 | Pathogens found in stool           | <b>PCA</b>                                                                                                                                          | cross-sectional; humans (n=500)                                        |
| Anuar et al. 2014         | Malaysia; rural                      | Individuals >2 years | Human stool, survey              | Cats, dogs                        | <b>Protozoa:</b> <i>G. duodenalis</i>                                                                                                                                                                                                                                                                                                  | Pathogens found in stool           | <b>PCA</b>                                                                                                                                          | cross-sectional; humans (n=611)                                        |

| Authors                  | Location & Geographic Classification | Study Population         | Data sources                                                                      | Animals                            | Pathogens                                                                                                                                                                                                                                                                                                   | Health Outcomes                    | Exposures to Animal Feces <sup>a</sup>                    | Study Design & Sample Size                                                                           |
|--------------------------|--------------------------------------|--------------------------|-----------------------------------------------------------------------------------|------------------------------------|-------------------------------------------------------------------------------------------------------------------------------------------------------------------------------------------------------------------------------------------------------------------------------------------------------------|------------------------------------|-----------------------------------------------------------|------------------------------------------------------------------------------------------------------|
| Bern et al. 2005         | Peru; peri-urban                     | HIV-positive individuals | Human stool, human blood, survey                                                  | Pigs, poultry, rabbits, sheep      | <b>Microsporidia:</b> <i>Enterocytozoon bieneusi</i><br><b>Protozoa:</b> <i>Cryptosporidium</i> spp., <i>Isospora belli</i> , <i>Cyclospora cayetanensis</i>                                                                                                                                                | Diarrhea, pathogens found in stool | <b>Contact with animal feces (CAF)</b>                    | cross-sectional and nested cohort; humans (n=2652)                                                   |
| Black et al. 1989        | Peru; peri-urban                     | Children <11 months      | Human stool, animal rectal samples, food samples, swabs of fomites                | Cats, dogs, poultry                | <b>Bacteria:</b> <i>Aeromonas hydrophila</i> , <i>Campylobacter</i> spp., Enterotoxigenic <i>Escherichia coli</i> (ETEC), Enteropathogenic <i>E. coli</i> (EPEC), <i>Shigella</i> spp., <i>Salmonella</i> spp., <i>Vibrio cholerae</i><br><b>Protozoa:</b> <i>Giardia</i> spp.<br><b>Viruses:</b> Rotavirus | Diarrhea, pathogens found in stool | <b>CE:</b> contamination of water; <b>PCA</b>             | longitudinal; children (n=153), food samples (n=1882), fomites (n=287), animal rectal samples (n=62) |
| Boehm et al. 2016        | Bangladesh; rural                    | All individuals          | Human stool, animal feces, drinking water/soil samples, child hand rinses, survey | Cattle, goats, poultry             | <b>Viruses:</b> Rotavirus                                                                                                                                                                                                                                                                                   | None                               | <b>PCA</b>                                                | nested randomized controlled trial; compounds (n=497)                                                |
| Bublitz et al. 2014      | Madagascar; rural                    | All individuals          | Human stool, animal feces, survey                                                 | Cattle, pigs, synanthropic rodents | <b>Bacteria:</b> ETEC, <i>Salmonella enterica</i> , <i>Shigella dysenteriae</i> , <i>Shigella flexneri</i> , <i>V. cholerae</i> , <i>Yersinia enterocolitica</i> , <i>Yersinia pseudotuberculosis</i>                                                                                                       | Pathogens found in stool           | <b>PCA</b>                                                | cross-sectional; humans (n=163), cattle (n=58), pigs (n=18), rodents (n=65)                          |
| Bukenya and Nwokolo 1991 | Papua New Guinea; peri-urban         | Children <5 years        | Survey                                                                            | Pigs                               | None                                                                                                                                                                                                                                                                                                        | Diarrhea                           | <b>PCA; presence of animal feces in environment (PAF)</b> | cohort; children (n=479)                                                                             |
| Cassenote et al. 2014    | Brazil; urban                        | Children 1-12 years      | Human stool, human blood, survey                                                  | Not specified                      | <b>Helminths:</b> <i>Toxocara</i> spp.                                                                                                                                                                                                                                                                      | Helminth seropositivity            | <b>CAF:</b> geophagy, lack of handwashing                 | cross-sectional; children (n=252)                                                                    |
| Chiodo et al. 2006       | Argentina; rural                     | Health center patients   | Human blood, dog feces, soil samples, survey                                      | Dogs                               | <b>Helminths:</b> <i>Toxocara canis</i>                                                                                                                                                                                                                                                                     | Helminth seropositivity            | <b>PCA</b>                                                | cross-sectional; humans (n=100), dogs (n=81)                                                         |



| Authors                    | Location & Geographic Classification | Study Population         | Data sources                                     | Animals                                              | Pathogens                                                                                                                                                                                                                                               | Health Outcomes                    | Exposures to Animal Feces <sup>a</sup>                                                       | Study Design & Sample Size                                                                   |
|----------------------------|--------------------------------------|--------------------------|--------------------------------------------------|------------------------------------------------------|---------------------------------------------------------------------------------------------------------------------------------------------------------------------------------------------------------------------------------------------------------|------------------------------------|----------------------------------------------------------------------------------------------|----------------------------------------------------------------------------------------------|
| Collinet-Adler et al. 2011 | India; rural and urban               | All individuals          | Human stool, fly samples, survey                 | Not specified                                        | <b>Bacteria:</b> <i>E. coli</i> , <i>Shigella</i> spp., <i>Vibrio</i> spp, <b>Protozoa:</b> <i>Cryptosporidium</i> spp., <i>Giardia</i> spp. <b>Viruses:</b> Rotavirus                                                                                  | Diarrhea                           | <b>PCA:</b> animals inside                                                                   | open cohort; humans (n=1274)                                                                 |
| Cumberland et al. 2005     | Ethiopia, rural                      | Children 3-9 years       | Observations, survey                             | Cattle                                               | <b>Bacteria:</b> <i>Chlamydia trachomatis</i>                                                                                                                                                                                                           | Trachoma                           | <b>PCA:</b> cows residing in or near home; <b>PAF</b>                                        | cross-sectional; children (n=1960)                                                           |
| Daniels et al. 2015        | India; rural                         | All individuals          | Human stool, animal feces, water samples         | Buffaloes, cats, cattle, dogs, goats, poultry, sheep | <b>Protozoa:</b> <i>Cryptosporidium</i> spp., <i>Giardia</i> spp.                                                                                                                                                                                       | Diarrhea, pathogens found in stool | <b>CE</b>                                                                                    | cross-sectional; humans (n=85), animals (n=111)                                              |
| Daniels et al. 2016        | India; rural                         | All individuals          | Meteorological data, census data, survey         | Buffaloes, cats, cattle, dogs, goats, poultry, sheep | <b>Protozoa:</b> <i>Cryptosporidium</i> spp., <i>Giardia</i> spp.                                                                                                                                                                                       | None                               | <b>CE</b>                                                                                    | conceptual model; community ponds (n=94), deep tube wells (n=107), shallow tube wells (n=96) |
| Dwivedi et al. 2007        | India; urban                         | HIV-positive individuals | Human stool, human blood, survey                 | Not specified                                        | <b>Helminths:</b> <i>A. duodenale</i> , <i>A. lumbricoides</i> , <i>Strongyloides stercoralis</i> <b>Microsporidia:</b> Not specified <b>Protozoa:</b> <i>C. parvum</i> , <i>G. lamblia</i> , <i>I. belli</i> , <i>C. cayetanensis</i> , <i>E. coli</i> | Diarrhea                           | <b>PCA</b>                                                                                   | case-control; diarrheic individuals (n=75), controls (n=25)                                  |
| El-Tras et al. 2015        | Egypt; rural                         | Children 7-15 years      | Human stool, poultry feces, observations, survey | Poultry                                              | <b>Bacteria:</b> <i>C. coli</i> , <i>C. jejuni</i>                                                                                                                                                                                                      | Pathogens found in stool           | <b>PCA:</b> residing in a household with <i>Campylobacter</i> spp.-infected backyard poultry | cross-sectional; children (n=106), poultry (n=379)                                           |
| Fernando et al. 2007       | Sri Lanka; urban                     | Children 5-12 years      | Human blood, survey                              | Dogs                                                 | <b>Helminths:</b> <i>Toxocara</i> spp.                                                                                                                                                                                                                  | Helminth seropositivity            | <b>PCA; CE:</b> playgrounds contaminated by dogs                                             | cross-sectional; children (n=196)                                                            |

| Authors                  | Location & Geographic Classification     | Study Population    | Data sources                                                        | Animals                                  | Pathogens                                                                            | Health Outcomes                                       | Exposures to Animal Feces <sup>a</sup>                                                       | Study Design & Sample Size                                                                                                                                   |
|--------------------------|------------------------------------------|---------------------|---------------------------------------------------------------------|------------------------------------------|--------------------------------------------------------------------------------------|-------------------------------------------------------|----------------------------------------------------------------------------------------------|--------------------------------------------------------------------------------------------------------------------------------------------------------------|
| George et al. 2015       | Bangladesh; rural                        | Children ≤30 months | Human stool, child health physicals, survey                         | Cattle, goats, poultry                   | None                                                                                 | Child growth, environmental enteric dysfunction (EED) | <b>PCA:</b> animals inside                                                                   | cross-sectional; children (n=216)                                                                                                                            |
| Grados et al. 1988       | Peru; peri-urban                         | Children <3 years   | Human and animal rectal swabs, survey                               | Cats, dogs, poultry                      | <b>Bacteria:</b> <i>Campylobacter</i> spp.                                           | Diarrhea                                              | <b>PCA:</b> residing in a household with <i>Campylobacter</i> spp.-infected backyard poultry | case-control; diarrheic children (n=104), controls (n=104)                                                                                                   |
| Hall et al. 2012         | Bangladesh; rural                        | All individuals     | Survey                                                              | Cattle                                   | None                                                                                 | None                                                  | <b>PCA; PAF</b>                                                                              | quasi-experimental; households (n=300), villagers (n=1500)                                                                                                   |
| Harris et al. 2016       | Bangladesh; urban                        | All individuals     | Human stool, animal feces, child hand rinses, floor samples, survey | Cattle, goats, poultry                   | Microbial source tracking (MST) assays to detect a composite of <i>Bacteroidales</i> | None                                                  | <b>CE</b>                                                                                    | cross-sectional; households (n=59)                                                                                                                           |
| Harvey et al. 2003       | Peru; peri-urban                         | All individuals     | Observations, survey                                                | Cattle, goats, poultry, sheep            | None                                                                                 | Behavior                                              | <b>PCA:</b> animal containment practices                                                     | cross-sectional; families for corralling practices (n=62), participants for perceptions of poultry (n=50), participants in semi-structured interviews (n=15) |
| Headey and Hirvonen 2016 | Ethiopia; rural                          | Children <5 years   | Survey                                                              | Cattle, goats, poultry, sheep            | None                                                                                 | Child growth                                          | <b>PCA:</b> poultry inside                                                                   | cross-sectional; children (n=3494)                                                                                                                           |
| Headey et al. 2016       | Bangladesh, Ethiopia, and Vietnam; rural | Children <5 years   | Observations, survey                                                | Buffaloes, cattle, goats, poultry, sheep | None                                                                                 | Diarrhea, child growth                                | <b>PCA; PAF</b>                                                                              | cross-sectional; mother and child dyads [Bangladesh (n=2214), Ethiopia (n=1750), and Vietnam (n=2104)]                                                       |
| Hetherington et al. 2017 | sub-Saharan Africa; rural                | Children <5 years   | Survey                                                              | Cattle, goats, pigs, poultry, sheep      | None                                                                                 | Child growth                                          | <b>PCA</b>                                                                                   | secondary data analysis; children (n=1543)                                                                                                                   |

| Authors              | Location & Geographic Classification | Study Population                     | Data sources                                | Animals                                      | Pathogens                                                                                                                                                                                              | Health Outcomes                   | Exposures to Animal Feces <sup>a</sup>                                                           | Study Design & Sample Size                                                         |
|----------------------|--------------------------------------|--------------------------------------|---------------------------------------------|----------------------------------------------|--------------------------------------------------------------------------------------------------------------------------------------------------------------------------------------------------------|-----------------------------------|--------------------------------------------------------------------------------------------------|------------------------------------------------------------------------------------|
| Hussain et al. 2013  | Bangladesh; rural                    | All individuals                      | Observations, survey                        | Not specified                                | None                                                                                                                                                                                                   | None                              | <b>CAF:</b> use of cow dung; <b>PAF;</b> <b>PCA</b>                                              | quasi-experimental; households at baseline (n=104); households at follow-up (n=75) |
| Kaur et al. 2017     | sub-Saharan Africa; rural            | Children <5 years                    | Survey                                      | Cattle, goats, pigs, poultry, sheep          | None                                                                                                                                                                                                   | Diarrhea, mortality, child growth | <b>PCA</b>                                                                                       | cross-sectional; children (n=215996)                                               |
| Labrique et al. 2013 | Bangladesh; rural                    | All individuals >1 year              | Human blood, survey                         | Cattle, goats, poultry, synanthropic rodents | <b>Viruses:</b> Hepatitis E virus (HEV)                                                                                                                                                                | Pathogens found in stool          | <b>CAF:</b> cow dung use for house repairs and cooking fuel                                      | case-control; HEV cases (n=46), controls (n=134)                                   |
| Leung et al. 2013    | Bangladesh; urban                    | All individuals                      | Human stool, survey                         | Goats, poultry                               | <b>Bacteria:</b> Non-typhoidal <i>Salmonella</i> (NTS)                                                                                                                                                 | Pathogens found in stool          | <b>PCA</b>                                                                                       | case-control; cases with NTS isolated in stool (n=468), controls (n=762)           |
| Li et al. 2015       | China; rural                         | Patients with pulmonary tuberculosis | Human stool, human blood, survey            | Not specified                                | <b>Helminths:</b> <i>A. lumbricoides</i> , <i>Clonorchis sinensis</i> , hookworm, <i>T. trichiura</i> <b>Protozoa:</b> <i>Blastocystis hominis</i> , <i>Entamoeba</i> spp., <i>Trichomonas hominis</i> | Pathogens found in stool          | <b>PCA:</b> raised pets or poultry/livestock                                                     | cross-sectional; humans (n=389)                                                    |
| Lupindu et al. 2014  | Tanzania; urban and peri-urban       | All individuals                      | Human stool, soil and water samples, survey | Cattle                                       | <b>Bacteria:</b> pathogenic <i>E. coli</i>                                                                                                                                                             | Pathogens found in stool          | <b>CAF:</b> cattle manure management, contact with cattle feces in soil in fields and households | cross-sectional; humans (n=200), cattle (n=446)                                    |
| Marquis et al. 1990  | Peru; peri-urban                     | Children <5 years                    | Observations                                | Poultry                                      | <b>Bacteria:</b> <i>C. jejuni</i>                                                                                                                                                                      | None                              | <b>CAF:</b> toddler feces-to-hand and feces-to-mouth episodes; <b>PCA:</b> poultry inside        | cross-sectional; children (n=21)                                                   |
| Moore et al. 2016    | Cambodia; urban                      | Children <16 years                   | Human stool, survey                         | Poultry                                      | <b>Protozoa:</b> <i>Cryptosporidium</i> spp., <i>G. duodenalis</i>                                                                                                                                     | Pathogens found in stool          | <b>PCA:</b> poultry inside                                                                       | cross-sectional; children (n=498)                                                  |
| Mosites et al. 2016  | Kenya; rural                         | Children <5 years                    | Survey                                      | Cattle, goats, poultry, sheep                | None                                                                                                                                                                                                   | Child growth                      | <b>PCA; Other:</b> livestock disease episodes                                                    | prospective cohort; children (n=925)                                               |

| Authors                  | Location & Geographic Classification | Study Population                   | Data sources                                                           | Animals                          | Pathogens                                                                                                                                                       | Health Outcomes                    | Exposures to Animal Feces <sup>a</sup>                                                                  | Study Design & Sample Size                                                               |
|--------------------------|--------------------------------------|------------------------------------|------------------------------------------------------------------------|----------------------------------|-----------------------------------------------------------------------------------------------------------------------------------------------------------------|------------------------------------|---------------------------------------------------------------------------------------------------------|------------------------------------------------------------------------------------------|
| Mpyet et al. 2012        | Nigeria; rural                       | All individuals >1 year            | Observations, survey                                                   | Not specified                    | <b>Bacteria:</b> <i>C. trachomatis</i>                                                                                                                          | Trachoma                           | <b>PCA</b>                                                                                              | cross-sectional; humans (n=4491)                                                         |
| Ngure et al. 2013        | Zimbabwe; rural                      | Caregivers and children <18 months | Observations, swabs of samples of potential fecal-oral vectors         | Poultry                          | <b>Bacteria:</b> <i>E. coli</i>                                                                                                                                 | None                               | <b>CAF:</b> floors contaminated with chicken feces or made of dirt/cow dung; <b>PCA:</b> poultry inside | cross-sectional; caregiver and child pairs (n=23)                                        |
| Nigusie et al. 2015      | Ethiopia; rural                      | Children 1-9 years                 | Observations, survey                                                   | Cattle                           | <b>Bacteria:</b> <i>C. trachomatis</i>                                                                                                                          | Trachoma                           | <b>PCA:</b> cattle in sleeping quarters, cattle ownership                                               | cross-sectional; children (n=618)                                                        |
| Nyariki et al. 2009      | Kenya; rural                         | All individuals                    | Survey                                                                 | Cattle, goats, sheep             | None                                                                                                                                                            | Behavior                           | <b>PCA:</b> herding, milking, and meat production practices                                             | cross-sectional; households (n=100)                                                      |
| Oberhelman et al. 2006   | Peru; peri-urban                     | All individuals                    | Human stool, animal feces, hand rinse, soil/food/water samples, survey | Poultry                          | <b>Bacteria:</b> <i>Campylobacter</i> spp.                                                                                                                      | Diarrhea, pathogens found in stool | <b>PCA:</b> animals inside; <b>PAF</b>                                                                  | longitudinal; households (n=62); samples from chickens, humans, and environment (n=3574) |
| Odagiri et al. 2016      | India; rural                         | Rural households                   | Water samples, mother and child hand rinses                            | Buffaloes, cattle, goats, sheep  | <b>Bacteria:</b> <i>E. coli</i> , <i>V. cholerae</i><br><b>Protozoa:</b> <i>Cryptosporidium</i> spp., <i>Giardia</i> spp. <b>Viruses:</b> Adenovirus, rotavirus | Diarrhea                           | <b>CE:</b> ponds and drinking water sources                                                             | cross-sectional; households (n=354)                                                      |
| Ordiz et al. 2016        | Malawi; rural                        | Children 12-61 months              | Human urine and stool, survey                                          | Not specified                    | None                                                                                                                                                            | EED                                | <b>PCA:</b> animals in sleeping quarters                                                                | cross-sectional; children (n=798)                                                        |
| Osbjør et al. 2015       | Cambodia; rural                      | All individuals                    | Survey                                                                 | Buffaloes, cattle, pigs, poultry | None                                                                                                                                                            | Behavior                           | <b>PCA:</b> animals in sleeping and food preparation areas                                              | cross-sectional; households (n=300)                                                      |
| Randremanana et al. 2016 | Madagascar; rural                    | Children <5 years                  | Human stool, child health physicals, survey                            | Cattle, poultry                  | <b>Bacteria:</b> <i>Campylobacter</i> spp., EPEC, <i>Shigella</i> spp. <b>Viruses:</b> Adenovirus, astrovirus, rotavirus                                        | Diarrhea, child growth             | <b>PCA</b>                                                                                              | case-control; diarrheic children (n=199), controls (n=199)                               |

| Authors                      | Location & Geographic Classification | Study Population                  | Data sources                                | Animals                  | Pathogens                                                                                                                     | Health Outcomes                                  | Exposures to Animal Feces <sup>a</sup>                                                | Study Design & Sample Size                                                      |
|------------------------------|--------------------------------------|-----------------------------------|---------------------------------------------|--------------------------|-------------------------------------------------------------------------------------------------------------------------------|--------------------------------------------------|---------------------------------------------------------------------------------------|---------------------------------------------------------------------------------|
| Reichert et al. 2016         | Brazil; urban                        | All individuals                   | Observations, survey                        | Cats, dogs               | <b>Helminths:</b> Hookworm                                                                                                    | Hookworm-related cutaneous larva migrans (HrCLM) | <b>PAF</b>                                                                            | cross-sectional; humans (n=806)                                                 |
| Schmidt et al. 2015          | India; rural                         | Children <5 years                 | Survey                                      | Cattle                   | None                                                                                                                          | Diarrhea, child growth                           | <b>PCA; CAF:</b> use of cow dung as fuel                                              | cohort; children (n=2739)                                                       |
| Schriewer et al. 2015        | India; rural                         | Households with children <5 years | Water samples, mother and child hand rinses | Not specified            | None                                                                                                                          | None                                             | <b>CE</b>                                                                             | cross-sectional; households (n=137)                                             |
| Sprenger et al. 2014         | Brazil; urban                        | N/A                               | Soil samples                                | Cats, dogs               | <b>Helminths:</b> Hookworm ( <i>Ancylostoma</i> spp.), Strongyloidea superfamily, <i>Toxocara</i> spp., <i>Trichuris</i> spp. | None                                             | <b>CE</b>                                                                             | cross-sectional; soil samples (n=345)                                           |
| Subrata et al. 2015          | Bali; urban                          | Mothers                           | Cat feces, survey                           | Cats                     | <b>Protozoa:</b> <i>Toxoplasma gondii</i>                                                                                     | Helminth seropositivity                          | <b>PAF:</b> exposure to <i>T. gondii</i> -infected cat feces from pets and stray cats | case-control; <i>T. gondii</i> -positive case mothers (n=40), controls (n=40)   |
| Sultana et al. 2012          | Bangladesh; rural                    | All individuals                   | Observations, survey                        | Poultry                  | None                                                                                                                          | Behavior                                         | <b>PCA:</b> poultry-raising practices                                                 | qualitative; households in interviews (n=40), households in observations (n=16) |
| Suwannarong and Chapman 2015 | Thailand; rural and urban            | Adults                            | Survey                                      | Synanthropic rodents     | None                                                                                                                          | Behavior                                         | <b>PCA:</b> contact with rodents in and around the home and when working with crops   | cross-sectional; humans (n=201)                                                 |
| Torondel et al. 2015         | India, rural                         | Households                        | Toy rinses                                  | Poultry, other livestock | <b>Bacteria:</b> <i>E. coli</i>                                                                                               | None                                             | <b>PCA:</b> animals inside                                                            | cross-sectional; assays (n=60), households (n=326)                              |
| Tun et al. 2015              | Malaysia; urban                      | Stray cats and dogs               | Cat and dog feces, soil samples             | Cats, dogs               | <b>Helminths:</b> <i>Ascaris</i> spp., hookworm, <i>Spirometra</i> spp., <i>Toxocara</i> spp., <i>Trichuris</i> spp.          | None                                             | <b>CE</b>                                                                             | cross-sectional; cat fecal samples (n=152), dog fecal samples (n=227)           |

| Authors              | Location & Geographic Classification    | Study Population                         | Data sources                        | Animals                                                                | Pathogens                                                                                                                                                                                                                                                      | Health Outcomes                    | Exposures to Animal Feces <sup>a</sup>                                  | Study Design & Sample Size                                                                                                                        |
|----------------------|-----------------------------------------|------------------------------------------|-------------------------------------|------------------------------------------------------------------------|----------------------------------------------------------------------------------------------------------------------------------------------------------------------------------------------------------------------------------------------------------------|------------------------------------|-------------------------------------------------------------------------|---------------------------------------------------------------------------------------------------------------------------------------------------|
| Uga et al. 2009      | Vietnam; suburban                       | Market vegetables                        | Vegetable rinses                    | Not specified                                                          | <b>Helminths:</b> <i>Ascaridia galli</i> , <i>Ascaris</i> spp., <i>Tenia</i> spp., <i>Toxocara</i> spp., <i>Trichuris</i> spp.                                                                                                                                 | None                               | <b>CAF:</b> animal feces used as fertilizer; <b>CF</b>                  | cross-sectional; vegetables (n=317)                                                                                                               |
| Vasco et al. 2016    | Ecuador; semi-rural                     | Children <6 years                        | Human stool, animal fecal samples   | Cats, cattle, dogs, guinea pigs, horses, pigs, poultry, rabbits, sheep | <b>Bacteria:</b> Atypical enteropathogenic <i>Escherichia coli</i> (aEPEC), <i>Campylobacter</i> spp., <i>Salmonella</i> spp., Shiga toxin-producing <i>E. coli</i> (STEC), <i>Yersinia</i> spp. <b>Protozoa:</b> <i>C. parvum</i> , <i>G. lamblia</i>         | Pathogens found in stool           | <b>PCA</b>                                                              | cross-sectional; children (n=64)                                                                                                                  |
| Vujcic et al. 2014   | Bangladesh; rural                       | Primary caregivers of children ≤ 3 years | Toy rinses, survey                  | Not specified                                                          | None                                                                                                                                                                                                                                                           | None                               | <b>CE</b>                                                               | cross-sectional; households (n=100)                                                                                                               |
| Wanyiri et al. 2014  | Kenya; urban                            | HIV-positive individuals                 | Human stool, human blood, survey    | Not specified                                                          | <b>Bacteria:</b> ETEC, <i>Klebsiella</i> spp., <i>Salmonella</i> spp. <b>Helminths:</b> <i>A. duodenale</i> , <i>A. lumbricoides</i> , <i>S. mansoni</i> <b>Protozoa:</b> <i>C. cayetanensis</i> , <i>E. histolytica</i> , <i>G. lamblia</i> , <i>I. belli</i> | Diarrhea                           | <b>PCA</b>                                                              | cross-sectional; humans (n=167)                                                                                                                   |
| Wolking et al. 2016  | Tanzania; rural                         | All individuals                          | Calf feces, survey                  | Cattle                                                                 | <b>Protozoa:</b> <i>Cryptosporidium</i> spp., <i>Giardia</i> spp.                                                                                                                                                                                              | Diarrhea                           | <b>CAF:</b> handling manure; <b>Other:</b> Exposure to diarrheic calves | cross-sectional; households (n=159), calves (n=312)                                                                                               |
| Wumba et al. 2012    | Democratic Republic of the Congo; urban | HIV-positive individuals                 | Human stool, survey                 | Dogs, goats, pigs, poultry                                             | <b>Helminths:</b> <i>A. lumbricoides</i> , <i>T. trichiura</i> <b>Protozoa:</b> <i>E. histolytica</i> , <i>G. lamblia</i>                                                                                                                                      | Diarrhea                           | <b>PCA</b>                                                              | cross-sectional; humans (n=242)                                                                                                                   |
| Zambrano et al. 2014 | Global; rural and urban                 | All individuals                          | Systematic review and meta-analysis | Cattle, goats, pigs, poultry, sheep                                    | <b>Bacteria:</b> <i>Campylobacter</i> spp., enterohemorrhagic <i>Escherichia coli</i> (EHEC) <b>Protozoa:</b> <i>Cryptosporidium</i> spp., <i>Giardia</i> spp.                                                                                                 | Diarrhea, pathogens found in stool | <b>PCA</b>                                                              | systematic review and meta-analysis; studies in qualitative synthesis (n=29), studies in systematic review (n=23), studies in meta-analysis (n=7) |

a. Codes for Exposure to Animal Feces: **CAF:** contact with animal feces; **CE:** contamination of environment; **CF:** contamination of food; **PCA:** presence of/contact with animals; and **PAF:** presence of animal feces in environment

## References

1. Moher, D., Liberati, A., Tetzlaff, J., Altman, D.G., The PRISMA Group. Preferred Reporting Items for Systematic Reviews and MetaAnalyses: The PRISMA Statement. *PLoS Medicine*. **2009**, 6, e1000097.
